# Supplementary material for: A QSP PDE Model of Adc Transport and Kinetics in Agrowing or Shrinking Tumor
Source: Research Square preprint supplement (doi:10.21203/rs.3.rs-6414876/v1), 2025-05-07
Supplement: Supplementary file 1 [file ADC PDE Supplement.pdf › Ross and Cabal ADC QSP Supplement/ADC PDE Supplement.pdf]

TABLE 2  
Parameters

| Parameter   | Value                 | Units           | Source                                                                  |
|-------------|-----------------------|-----------------|-------------------------------------------------------------------------|
| $k_{on}$    | 4.80                  | $nM^{-1}h^{-1}$ | Maass [9]<br>Nessler [1]<br>Jin [7]<br>Datta-Mannan [3]                 |
| $k_{off}$   | 2.00                  | $h^{-1}$        | Tsumura [12]<br>Maass [9]<br>Nessler [1]<br>Jin [7]<br>Datta-Mannan [3] |
| $D$         | $1.0 \times 10^{-8}$  | $m^2/h$         | Tsumura [12]<br>Jain [6]                                                |
| $\epsilon$  | 0.24                  | dimensionless   | Weddell [13]                                                            |
| $k_{int}$   | 0.18                  | $h^{-1}$        | Nessler [1]<br>Durbin [4]<br>Jin [7]<br>Maass [9]                       |
| $k_{pro}$   | $3.85 \times 10^{-4}$ | $h^{-1}$        | Rich [10]                                                               |
| $G_0$       | $2.5 \times 10^3$     | $nM$            | Wu [14]<br>Antony [2]                                                   |
| $k_{ic}$    | 0.6                   | $h^{-1}$        | estimated                                                               |
| $k_{kill}$  | $4.0 \times 10^{-3}$  | $h^{-1}$        | Simeoni [11]                                                            |
| $DAR$       | 4.0                   | Dimensionless   | Fu [5]<br>Lopez de Sa [8]                                               |
| $EC50$      | 8.0                   | $nM$            | estimated                                                               |
| $k_{cl}$    | $3.0 \times 10^{-2}$  | $h^{-1}$        | Simeoni [11]                                                            |
| $V_{serum}$ | 3.13                  | $L$             | Weddell [13]                                                            |
| $V_{tight}$ | 58.57                 | $L$             | Weddell [13]                                                            |
| $V_{leaky}$ | 8.93                  | $L$             | Weddell [13]                                                            |
| $V_{lymph}$ | 0.27                  | $L$             | Weddell [13]                                                            |
| $k_1$       | 9.7519                | $L/h$           | Weddell [13]                                                            |
| $k_2$       | .156                  | $L/h$           | Weddell [13]                                                            |
| $k_3$       | 97.324                | $L/h$           | Weddell [13]                                                            |
| $k_4$       | 4.0186                | $L/h$           | Weddell [13]                                                            |
| $k_5$       | .128                  | $L/h$           | Weddell [13]                                                            |
| $k_6$       | 80.212                | $L/h$           | Weddell [13]                                                            |
| $k_7$       | .355                  | $L/h$           | Weddell [13]                                                            |
| $l_8$       | .016                  | $h^{-1}$        | Weddell [13]                                                            |
| $l_9$       | $1.0 \times 10^{-4}$  | $h^{-1}$        | Weddell [13]                                                            |

## REFERENCES

- [1] *The Challenges Facing Antibody-Drug Conjugates for Immuno-Oncology*. <https://oxfordglobal.com/nextgen-biomed/resources/the-challenges-facing-antibody-drug-conjugates-for-immuno-oncology>. Accessed: 2025-02-14.
- [2] A. ANTONY, Y. S. TANG, R. A. KHAN, M. P. BIJU, X. XIAO, L. Q. J., X. L. SUN, H. N. JAYARAM, AND S. P. STABLER, *Translational upregulation of folate receptors is mediated by homocysteine via rna heterogeneous nuclear ribonucleoprotein e1 interactions*, J. Clin. Invest., 113 (2004), <https://doi.org/10.1172/JCI200411548>.
- [3] A. DATTA-MANNAN, H. CHOI, Z. JIN, L. LIU, J. LU, D. J. STOKEL, A. T. MURPHY, K. W. DUNN, M. M. MARTINEZ, AND Y. FENG, *Reducing target binding affinity improves the therapeutic index of anti-met antibody-drug conjugate in tumor bearing animals.*, PLoS ONE, 19 (2024), <https://doi.org/10.1371/journal.pone.0293703>.
- [4] K. R. DURBIN, C. PHIPPS, AND X. LIAO, *Mechanistic modeling of antibody-drug conjugate internalization at the cellular level reveals inefficient processing steps*, Mol Cancer Ther, 17 (2018), <https://doi.org/10.4161/mabs.28965>.
- [5] Z. FU, S. LI, S. HAN, C. SHI, AND Y. ZHANG, *Antibody drug conjugate: the “biological missile” for targeted cancer therapy*, Signal Transduction and Targeted Therapy, 7 (2022), <https://doi.org/10.1038/s41392-022-00947-7>.
- [6] R. K. JAIN, *Physiological barriers to delivery of monoclonal antibodies and other macromolecules in tumors*, Cancer Research, 50 (1990).
- [7] Y. JIN, M. A. SCHLADETSCH, X. HUANG, M. J. BALUNAS, AND A. J. WIEMER, *Stepping forward in antibody-drug conjugate development*, Pharmacol Ther., 229 (2022), <https://doi.org/10.1016/j.pharmthera.2021.107917>.
- [8] A. LOPEZ DE SA, C. DIAZ-TEJEIRO, E. PYATOS-RACIONERO, C. NIETO-JIMENEZ, L. PANIAGUA-HERRANZ, A. SANVICENTE, E. CALVO, P. PEREZ-SEGURA, V. MORENO, F. MORIS, AND A. OCANA, *Considerations for the design of antibody drug conjugates (adc) for clinical development: lessons learned*, J Hematol Oncol, 16 (2023), <https://doi.org/10.1186/s13045-023-01519-0>.
- [9] K. F. MAASS, C. KULKARNI, A. M. BETTS, AND K. D. WITTRUP, *Determination of cellular processing rates for a trastuzumab-maytansinoid antibody-drug conjugate (adc) highlights key parameters for adc design.*, AAPS Journal, 18 (2016), <https://doi.org/10.1208/s12248-016-9892-3>.
- [10] N. E. RICH, B. V. JOHN, N. D. PARIKH, I. ROWE, N. MEHTA, G. KHATRI, S. M. THOMAS, M. ANIS, M. MENDIRATTA-LALA, C. HERNANDEZ, M. ODEWOLE, L. T. SUNDARAM, V. R. KONJETI, S. SHETTY, T. SHAH, H. ZHU, A. C. YOPP, Y. HOSHIDA, F. Y. YAO, J. A. MARRERO, AND A. G. SINGAL, *Hepatocellular carcinoma demonstrates heterogeneous growth patterns in a multicenter cohort of patients with cirrhosis*, Hepatology, 72 (2020), <https://doi.org/10.1071/CH08240>.
- [11] M. SIMEONI, P. MAGNI, C. CAMMIA, G. DE NICOLAO, V. CROCI, AND E. PESENTI, *Predictive pharmacokinetic-pharmacodynamic modeling of tumor growth kinetics in xenograft models after administration of anticancer agents*, Cancer Research, 64 (2004).
- [12] R. TSUMUA, S. MANABE, H. TAKASHIMA, Y. KOGA, Y. MASAHIRO, AND Y. MASUMURA, *E influence of the dissociation rate constant on the intra-tumor distribution of antibody-drug conjugate against tissue factor*, Journal of Controlled Release, 284 (2018), <https://doi.org/10.1016/j.jconrel.2018.06.016>.
- [13] J. WEDDELL, M. S. CHINEY, S. BHATNAGAR, J. P. GIBBS, AND M. SHEBLEY, *Mechanistic modeling of intra-tumor spatial distribution of antibody-drug conjugates: Insights into dosing strategies in oncology*, Clin Transl Sci, 14 (2021), <https://doi.org/10.1111/cts.12892>.
- [14] R. WU, C. LIANG, J. ZOI, C. LI, Y. YAN, X. HU, AND X. LING, *Detection of membrane receptors on per tumor cell by nonimmobilized cell capillary electrophoresis and a mathematic model*, Talanta, 222 (2020), <https://doi.org/10.1016/j.talanta.2020.121425>.
